# Supplementary material
Source: publisher figshare collection journal article supplement (https://acs.figshare.com/ndownloader/files/5337850)
Supplement: Supplementary file 1 [file 5337850]

 
data_cc7_(5a)
 
_audit_creation_method            SHELXL-97 
_chemical_name_systematic 
; 
 ? 
; 
_chemical_name_common             ? 
_chemical_melting_point           ? 
_chemical_formula_moiety          'C34 H26 Cl2 O2 P2 Pd' 
_chemical_formula_sum 
 'C34 H26 Cl2 O2 P2 Pd' 
_chemical_formula_weight          705.79  
 
loop_ 
 _atom_type_symbol 
 _atom_type_description 
 _atom_type_scat_dispersion_real 
 _atom_type_scat_dispersion_imag 
 _atom_type_scat_source 
 'C'  'C'   0.0033   0.0016 
 'International Tables Vol C Tables 4.2.6.8 and 6.1.1.4' 
 'H'  'H'   0.0000   0.0000 
 'International Tables Vol C Tables 4.2.6.8 and 6.1.1.4' 
 'Cl'  'Cl'   0.1484   0.1585 
 'International Tables Vol C Tables 4.2.6.8 and 6.1.1.4' 
 'O'  'O'   0.0106   0.0060 
 'International Tables Vol C Tables 4.2.6.8 and 6.1.1.4' 
 'P'  'P'   0.1023   0.0942 
 'International Tables Vol C Tables 4.2.6.8 and 6.1.1.4' 
 'Pd'  'Pd'  -0.9988   1.0072 
 'International Tables Vol C Tables 4.2.6.8 and 6.1.1.4' 
 
_symmetry_cell_setting            triclinic 
_symmetry_space_group_name_H-M    P-1 
 
loop_ 
 _symmetry_equiv_pos_as_xyz 
 'x, y, z' 
 '-x, -y, -z' 
 
_cell_length_a                    8.6428(19) 
_cell_length_b                    14.3923(23) 
_cell_length_c                    14.5761(19) 
_cell_angle_alpha                 69.525(13)
_cell_angle_beta                  85.969(15) 
_cell_angle_gamma                 80.834(16) 
_cell_volume                      1676.6(6) 
_cell_formula_units_Z             2 
_cell_measurement_temperature     193(2) 
_cell_measurement_reflns_used     7703 
_cell_measurement_theta_min       5 
_cell_measurement_theta_max       50 
 
_exptl_crystal_description        block 
_exptl_crystal_colour             colourless 
_exptl_crystal_size_max           0.36 
_exptl_crystal_size_mid           0.24 
_exptl_crystal_size_min           0.10 
_exptl_crystal_density_meas       'not measured' 
_exptl_crystal_density_diffrn     1.398 
_exptl_crystal_density_method     ? 
_exptl_crystal_F_000              712 
_exptl_absorpt_coefficient_mu     0.836 
_exptl_absorpt_correction_type    'multi-scan' 
_exptl_absorpt_correction_T_min   0.842559 
_exptl_absorpt_correction_T_max   0.942281 
_exptl_absorpt_process_details    'SADABS (Sheldrick, 1996)'
 
_exptl_special_details 
; 
# SQUEEZE RESULTS (APPEND TO CIF)
loop_
  _platon_squeeze_void_nr
  _platon_squeeze_void_average_x
  _platon_squeeze_void_average_y
  _platon_squeeze_void_average_z
  _platon_squeeze_void_volume
  _platon_squeeze_void_count_electrons
         1     0.151     0.136     0.711      88.0      22.1
         2     0.000     0.500     1.000      93.1      14.0
         3    -0.151     0.864     0.289      88.1      23.1
_platon_squeeze_details  
; 
 
_diffrn_ambient_temperature       193(2) 
_diffrn_radiation_wavelength      0.71073 
_diffrn_radiation_type            MoK\a 
_diffrn_radiation_source          'fine-focus sealed tube' 
_diffrn_radiation_monochromator   graphite 
_diffrn_measurement_device_type   'Siemens SMART area detector' 
_diffrn_measurement_method        'narrow frame \w scans' 
_diffrn_detector_area_resol_mean  8.366 
_diffrn_standards_number          ? 
_diffrn_standards_interval_count  ? 
_diffrn_standards_interval_time   ? 
_diffrn_standards_decay_%         none 
_diffrn_reflns_number             17147 
_diffrn_reflns_av_R_equivalents   0.0509 
_diffrn_reflns_av_sigmaI/netI     0.0573 
_diffrn_reflns_limit_h_min        -11 
_diffrn_reflns_limit_h_max        11 
_diffrn_reflns_limit_k_min        -18 
_diffrn_reflns_limit_k_max        18 
_diffrn_reflns_limit_l_min        -18 
_diffrn_reflns_limit_l_max        18 
_diffrn_reflns_theta_min          1.73 
_diffrn_reflns_theta_max          27.44 
_reflns_number_total              7527 
_reflns_number_gt                 5717 
_reflns_threshold_expression      >2sigma(I) 
 
_computing_data_collection        'SMART (Siemens, 1995b)' 
_computing_cell_refinement        'SAINT (Siemens, 1995b)' 
_computing_data_reduction         'SAINT (Siemens, 1995b)' 
_computing_structure_solution     'SHELXS-97 (Sheldrick, 1990)' 
_computing_structure_refinement   'SHELXL-97 (Sheldrick, 1997)' 
_computing_molecular_graphics     'SHELXTL (Siemens, 1995a)' 
_computing_publication_material   'SHELXTL (Siemens, 1995a)' 
 
_refine_special_details 
; 
 Refinement of F^2^ against ALL reflections.  The weighted R-factor wR and 
 goodness of fit S are based on F^2^, conventional R-factors R are based 
 on F, with F set to zero for negative F^2^. The threshold expression of 
 F^2^ > 2sigma(F^2^) is used only for calculating R-factors(gt) etc. and is 
 not relevant to the choice of reflections for refinement.  R-factors based 
 on F^2^ are statistically about twice as large as those based on F, and R- 
 factors based on ALL data will be even larger. 
; 
 
_refine_ls_structure_factor_coef  Fsqd  
_refine_ls_matrix_type            full 
_refine_ls_weighting_scheme       calc  
_refine_ls_weighting_details 
 'calc w=1/[\s^2^(Fo^2^)+(0.0198P)^2^+3.1259P] where P=(Fo^2^+2Fc^2^)/3' 
_atom_sites_solution_primary      direct 
_atom_sites_solution_secondary    difmap 
_atom_sites_solution_hydrogens    geom 
_refine_ls_hydrogen_treatment     constr 
_refine_ls_extinction_method      none 
_refine_ls_extinction_coef        ? 
_refine_ls_number_reflns          7527 
_refine_ls_number_parameters      370 
_refine_ls_number_restraints      0 
_refine_ls_R_factor_all           0.0666 
_refine_ls_R_factor_gt            0.0439 
_refine_ls_wR_factor_ref          0.0883 
_refine_ls_wR_factor_gt           0.0805 
_refine_ls_goodness_of_fit_ref    1.049 
_refine_ls_restrained_S_all       1.049 
_refine_ls_shift/su_max           0.001 
_refine_ls_shift/su_mean          0.000 
 
loop_ 
 _atom_site_label 
 _atom_site_type_symbol 
 _atom_site_fract_x 
 _atom_site_fract_y 
 _atom_site_fract_z 
 _atom_site_U_iso_or_equiv 
 _atom_site_adp_type 
 _atom_site_occupancy 
 _atom_site_symmetry_multiplicity 
 _atom_site_calc_flag 
 _atom_site_refinement_flags 
 _atom_site_disorder_assembly 
 _atom_site_disorder_group 
Pd1 Pd 0.49070(3) 0.27902(2) 0.269402(19) 0.01747(7) Uani 1 1 d . . . 
Cl1 Cl 0.24033(10) 0.30801(7) 0.20086(6) 0.02602(19) Uani 1 1 d . . . 
Cl2 Cl 0.39710(10) 0.28503(7) 0.42495(6) 0.02394(19) Uani 1 1 d . . . 
P1 P 0.60245(11) 0.27791(7) 0.12988(6) 0.02092(19) Uani 1 1 d . . . 
P2 P 0.73655(10) 0.24343(6) 0.32650(6) 0.01759(18) Uani 1 1 d . . . 
O1 O 0.6094(3) 0.17913(17) 0.10127(17) 0.0248(5) Uani 1 1 d . . . 
O2 O 0.5217(3) 0.36759(17) 0.03871(16) 0.0233(5) Uani 1 1 d . . . 
C1 C 0.8698(4) 0.2151(3) 0.2321(3) 0.0238(8) Uani 1 1 d . . . 
H1A H 0.9750 0.2259 0.2407 0.029 Uiso 1 1 calc R . . 
H1B H 0.8731 0.1455 0.2380 0.029 Uiso 1 1 calc R . . 
C2 C 0.8094(4) 0.2842(3) 0.1309(2) 0.0259(8) Uani 1 1 d . . . 
H2A H 0.8643 0.2622 0.0801 0.031 Uiso 1 1 calc R . . 
H2B H 0.8263 0.3524 0.1193 0.031 Uiso 1 1 calc R . . 
C21 C 0.7621(4) 0.1314(3) 0.4351(3) 0.0226(7) Uani 1 1 d . . . 
C22 C 0.6977(5) 0.0491(3) 0.4337(3) 0.0341(9) Uani 1 1 d . . . 
H22A H 0.6468 0.0530 0.3780 0.041 Uiso 1 1 calc R . . 
C23 C 0.7087(5) -0.0388(3) 0.5145(4) 0.0423(11) Uani 1 1 d . . . 
H23A H 0.6658 -0.0934 0.5128 0.051 Uiso 1 1 calc R . . 
C24 C 0.7836(5) -0.0448(3) 0.5975(3) 0.0416(11) Uani 1 1 d . . . 
H24A H 0.7899 -0.1031 0.6521 0.050 Uiso 1 1 calc R . . 
C25 C 0.8487(5) 0.0360(3) 0.5990(3) 0.0403(10) Uani 1 1 d . . . 
H25A H 0.9005 0.0314 0.6546 0.048 Uiso 1 1 calc R . . 
C26 C 0.8379(5) 0.1240(3) 0.5186(3) 0.0299(8) Uani 1 1 d . . . 
H26A H 0.8817 0.1782 0.5208 0.036 Uiso 1 1 calc R . . 
C31 C 0.8036(4) 0.3460(2) 0.3513(2) 0.0184(7) Uani 1 1 d . . . 
C32 C 0.6982(4) 0.4312(3) 0.3484(3) 0.0247(8) Uani 1 1 d . . . 
H32A H 0.5940 0.4358 0.3329 0.030 Uiso 1 1 calc R . . 
C33 C 0.7483(4) 0.5092(3) 0.3686(3) 0.0291(8) Uani 1 1 d . . . 
H33A H 0.6778 0.5661 0.3660 0.035 Uiso 1 1 calc R . . 
C34 C 0.9022(4) 0.5023(3) 0.3925(3) 0.0271(8) Uani 1 1 d . . . 
H34 H 0.9347 0.5538 0.4076 0.032 Uiso 1 1 calc R . . 
C35 C 1.0093(4) 0.4182(3) 0.3942(3) 0.0252(8) Uani 1 1 d . . . 
H35A H 1.1135 0.4143 0.4091 0.030 Uiso 1 1 calc R . . 
C36 C 0.9607(4) 0.3402(3) 0.3737(2) 0.0221(7) Uani 1 1 d . . . 
H36A H 1.0323 0.2842 0.3748 0.027 Uiso 1 1 calc R . . 
C41 C 0.5549(4) 0.3670(3) -0.0577(2) 0.0209(7) Uani 1 1 d . . . 
C42 C 0.6368(4) 0.4433(3) -0.1192(3) 0.0234(7) Uani 1 1 d . . . 
H42A H 0.6679 0.4899 -0.0959 0.028 Uiso 1 1 calc R . . 
C43 C 0.6700(4) 0.4479(3) -0.2134(3) 0.0247(8) Uani 1 1 d . . . 
H43A H 0.7209 0.4994 -0.2553 0.030 Uiso 1 1 calc R . . 
C44 C 0.6668(4) 0.3762(3) -0.3454(3) 0.0301(8) Uani 1 1 d . . . 
H44A H 0.7185 0.4271 -0.3875 0.036 Uiso 1 1 calc R . . 
C45 C 0.6298(5) 0.3041(3) -0.3778(3) 0.0341(9) Uani 1 1 d . . . 
H45A H 0.6534 0.3074 -0.4420 0.041 Uiso 1 1 calc R . . 
C46 C 0.5563(5) 0.2255(3) -0.3138(3) 0.0325(9) Uani 1 1 d . . . 
H46A H 0.5367 0.1748 -0.3352 0.039 Uiso 1 1 calc R . . 
C47 C 0.5124(4) 0.2214(3) -0.2199(3) 0.0266(8) Uani 1 1 d . . . 
H47A H 0.4617 0.1692 -0.1792 0.032 Uiso 1 1 calc R . . 
C48 C 0.5011(4) 0.2967(2) -0.0873(2) 0.0202(7) Uani 1 1 d . . . 
C49 C 0.6278(4) 0.3749(3) -0.2483(2) 0.0221(7) Uani 1 1 d . . . 
C50 C 0.5450(4) 0.2975(3) -0.1848(2) 0.0222(7) Uani 1 1 d . . . 
C51 C 0.4669(4) 0.1610(3) 0.0725(3) 0.0252(8) Uani 1 1 d . . . 
C52 C 0.3944(5) 0.0824(3) 0.1376(3) 0.0303(9) Uani 1 1 d . . . 
H52A H 0.4413 0.0421 0.1966 0.036 Uiso 1 1 calc R . . 
C53 C 0.2540(5) 0.0658(3) 0.1134(3) 0.0343(9) Uani 1 1 d . . . 
H53A H 0.2074 0.0121 0.1550 0.041 Uiso 1 1 calc R . . 
C54 C 0.0257(5) 0.1194(3) 0.0036(3) 0.0371(10) Uani 1 1 d . . . 
H54A H -0.0240 0.0677 0.0460 0.044 Uiso 1 1 calc R . . 
C55 C -0.0492(5) 0.1842(4) -0.0788(3) 0.0416(11) Uani 1 1 d . . . 
H55A H -0.1490 0.1761 -0.0919 0.050 Uiso 1 1 calc R . . 
C56 C 0.0239(5) 0.2634(3) -0.1441(3) 0.0387(10) Uani 1 1 d . . . 
H56A H -0.0286 0.3082 -0.1994 0.046 Uiso 1 1 calc R . . 
C57 C 0.1724(4) 0.2743(3) -0.1260(3) 0.0289(8) Uani 1 1 d . . . 
H57A H 0.2200 0.3263 -0.1700 0.035 Uiso 1 1 calc R . . 
C58 C 0.4089(4) 0.2201(2) -0.0182(2) 0.0204(7) Uani 1 1 d . . . 
C59 C 0.1781(5) 0.1298(3) 0.0254(3) 0.0293(8) Uani 1 1 d . . . 
C60 C 0.2554(4) 0.2080(3) -0.0417(3) 0.0242(8) Uani 1 1 d . . . 
 
loop_ 
 _atom_site_aniso_label 
 _atom_site_aniso_U_11 
 _atom_site_aniso_U_22 
 _atom_site_aniso_U_33 
 _atom_site_aniso_U_23 
 _atom_site_aniso_U_13 
 _atom_site_aniso_U_12 
Pd1 0.01723(13) 0.02091(14) 0.01520(13) -0.00654(10) 0.00002(9) -0.00479(10) 
Cl1 0.0209(4) 0.0333(5) 0.0234(4) -0.0070(4) -0.0027(3) -0.0079(4) 
Cl2 0.0246(4) 0.0294(5) 0.0181(4) -0.0087(4) 0.0037(3) -0.0053(4) 
P1 0.0243(5) 0.0242(5) 0.0154(4) -0.0081(4) -0.0007(4) -0.0039(4) 
P2 0.0173(4) 0.0206(4) 0.0159(4) -0.0071(4) -0.0001(3) -0.0044(3) 
O1 0.0324(14) 0.0243(13) 0.0186(12) -0.0089(10) -0.0078(11) -0.0002(11) 
O2 0.0341(14) 0.0222(12) 0.0144(12) -0.0085(10) 0.0017(10) -0.0023(11) 
C1 0.0198(18) 0.032(2) 0.0261(19) -0.0169(16) 0.0024(14) -0.0058(15) 
C2 0.0247(19) 0.036(2) 0.0190(18) -0.0116(16) 0.0061(15) -0.0085(16) 
C21 0.0172(17) 0.0236(18) 0.0245(18) -0.0072(15) 0.0009(14) 0.0011(14) 
C22 0.035(2) 0.029(2) 0.043(2) -0.0153(18) -0.0023(18) -0.0102(17) 
C23 0.035(2) 0.023(2) 0.064(3) -0.008(2) 0.004(2) -0.0079(18) 
C24 0.035(2) 0.026(2) 0.046(3) 0.0056(19) 0.011(2) 0.0002(18) 
C25 0.047(3) 0.039(2) 0.023(2) 0.0026(18) -0.0045(19) -0.001(2) 
C26 0.036(2) 0.029(2) 0.0228(19) -0.0066(16) -0.0010(16) -0.0040(17) 
C31 0.0214(17) 0.0198(16) 0.0135(16) -0.0052(13) -0.0001(13) -0.0027(14) 
C32 0.0215(18) 0.0227(18) 0.0287(19) -0.0068(15) -0.0031(15) -0.0031(14) 
C33 0.030(2) 0.0193(18) 0.037(2) -0.0094(16) -0.0032(17) -0.0003(15) 
C34 0.031(2) 0.0243(19) 0.029(2) -0.0099(16) -0.0049(16) -0.0075(16) 
C35 0.0194(18) 0.0287(19) 0.029(2) -0.0106(16) -0.0012(15) -0.0071(15) 
C36 0.0224(18) 0.0232(18) 0.0211(17) -0.0076(14) 0.0001(14) -0.0049(14) 
C41 0.0263(19) 0.0216(17) 0.0133(16) -0.0059(13) -0.0015(14) 0.0015(14) 
C42 0.0258(19) 0.0204(17) 0.0237(18) -0.0068(15) -0.0034(15) -0.0028(14) 
C43 0.0256(19) 0.0219(18) 0.0233(18) -0.0043(15) 0.0010(15) -0.0028(15) 
C44 0.027(2) 0.042(2) 0.0196(18) -0.0093(17) 0.0001(15) -0.0025(17) 
C45 0.037(2) 0.050(3) 0.0196(19) -0.0192(18) -0.0018(17) -0.0020(19) 
C46 0.036(2) 0.042(2) 0.027(2) -0.0224(18) -0.0013(17) -0.0040(18) 
C47 0.029(2) 0.030(2) 0.0213(19) -0.0101(16) -0.0029(15) -0.0028(16) 
C48 0.0214(18) 0.0209(17) 0.0166(17) -0.0052(14) -0.0020(14) -0.0003(14) 
C49 0.0192(17) 0.0294(19) 0.0159(17) -0.0075(14) 0.0002(13) 0.0006(14) 
C50 0.0224(18) 0.0262(18) 0.0163(17) -0.0071(14) -0.0052(14) 0.0034(14) 
C51 0.031(2) 0.0245(18) 0.0248(19) -0.0143(15) -0.0021(15) -0.0035(15) 
C52 0.048(2) 0.0217(19) 0.0197(18) -0.0043(15) 0.0000(17) -0.0064(17) 
C53 0.048(3) 0.028(2) 0.031(2) -0.0121(17) 0.0100(19) -0.0175(19) 
C54 0.034(2) 0.045(2) 0.044(3) -0.028(2) 0.0149(19) -0.017(2) 
C55 0.021(2) 0.064(3) 0.056(3) -0.040(3) 0.003(2) -0.008(2) 
C56 0.030(2) 0.049(3) 0.043(3) -0.025(2) -0.0054(19) 0.0005(19) 
C57 0.024(2) 0.032(2) 0.029(2) -0.0103(17) -0.0030(16) -0.0007(16) 
C58 0.0256(18) 0.0208(17) 0.0169(17) -0.0096(14) 0.0036(14) -0.0036(14) 
C59 0.034(2) 0.0264(19) 0.034(2) -0.0182(17) 0.0110(17) -0.0109(16) 
C60 0.0241(19) 0.0270(19) 0.0262(19) -0.0151(16) 0.0038(15) -0.0055(15) 
 
_geom_special_details 
; 
 All esds (except the esd in the dihedral angle between two l.s. planes) 
 are estimated using the full covariance matrix.  The cell esds are taken 
 into account individually in the estimation of esds in distances, angles 
 and torsion angles; correlations between esds in cell parameters are only 
 used when they are defined by crystal symmetry.  An approximate (isotropic) 
 treatment of cell esds is used for estimating esds involving l.s. planes. 
; 
 
loop_ 
 _geom_bond_atom_site_label_1 
 _geom_bond_atom_site_label_2 
 _geom_bond_distance 
 _geom_bond_site_symmetry_2 
 _geom_bond_publ_flag 
Pd1 P1 2.1933(9) . ? 
Pd1 P2 2.2525(9) . ? 
Pd1 Cl1 2.3621(9) . ? 
Pd1 Cl2 2.3790(9) . ? 
P1 O2 1.601(2) . ? 
P1 O1 1.607(2) . ? 
P1 C2 1.807(4) . ? 
P2 C21 1.818(4) . ? 
P2 C31 1.822(3) . ? 
P2 C1 1.845(3) . ? 
O1 C51 1.419(4) . ? 
O2 C41 1.417(4) . ? 
C1 C2 1.535(5) . ? 
C1 H1A 0.9700 . ? 
C1 H1B 0.9700 . ? 
C2 H2A 0.9700 . ? 
C2 H2B 0.9700 . ? 
C21 C26 1.387(5) . ? 
C21 C22 1.394(5) . ? 
C22 C23 1.390(6) . ? 
C22 H22A 0.9300 . ? 
C23 C24 1.381(6) . ? 
C23 H23A 0.9300 . ? 
C24 C25 1.377(6) . ? 
C24 H24A 0.9300 . ? 
C25 C26 1.388(5) . ? 
C25 H25A 0.9300 . ? 
C26 H26A 0.9300 . ? 
C31 C32 1.396(5) . ? 
C31 C36 1.401(5) . ? 
C32 C33 1.393(5) . ? 
C32 H32A 0.9300 . ? 
C33 C34 1.378(5) . ? 
C33 H33A 0.9300 . ? 
C34 C35 1.397(5) . ? 
C34 H34 0.9300 . ? 
C35 C36 1.388(5) . ? 
C35 H35A 0.9300 . ? 
C36 H36A 0.9300 . ? 
C41 C48 1.382(5) . ? 
C41 C42 1.407(5) . ? 
C42 C43 1.364(5) . ? 
C42 H42A 0.9300 . ? 
C43 C49 1.421(5) . ? 
C43 H43A 0.9300 . ? 
C44 C45 1.368(5) . ? 
C44 C49 1.426(5) . ? 
C44 H44A 0.9300 . ? 
C45 C46 1.401(6) . ? 
C45 H45A 0.9300 . ? 
C46 C47 1.378(5) . ? 
C46 H46A 0.9300 . ? 
C47 C50 1.432(5) . ? 
C47 H47A 0.9300 . ? 
C48 C50 1.441(5) . ? 
C48 C58 1.502(5) . ? 
C49 C50 1.432(5) . ? 
C51 C58 1.376(5) . ? 
C51 C52 1.401(5) . ? 
C52 C53 1.366(5) . ? 
C52 H52A 0.9300 . ? 
C53 C59 1.423(6) . ? 
C53 H53A 0.9300 . ? 
C54 C55 1.364(6) . ? 
C54 C59 1.419(5) . ? 
C54 H54A 0.9300 . ? 
C55 C56 1.411(6) . ? 
C55 H55A 0.9300 . ? 
C56 C57 1.372(5) . ? 
C56 H56A 0.9300 . ? 
C57 C60 1.422(5) . ? 
C57 H57A 0.9300 . ? 
C58 C60 1.444(5) . ? 
C59 C60 1.431(5) . ? 
 
loop_ 
 _geom_angle_atom_site_label_1 
 _geom_angle_atom_site_label_2 
 _geom_angle_atom_site_label_3 
 _geom_angle 
 _geom_angle_site_symmetry_1 
 _geom_angle_site_symmetry_3 
 _geom_angle_publ_flag 
P1 Pd1 P2 85.40(3) . . ? 
P1 Pd1 Cl1 90.50(3) . . ? 
P2 Pd1 Cl1 175.06(4) . . ? 
P1 Pd1 Cl2 173.37(3) . . ? 
P2 Pd1 Cl2 88.62(3) . . ? 
Cl1 Pd1 Cl2 95.61(3) . . ? 
O2 P1 O1 104.98(12) . . ? 
O2 P1 C2 110.16(16) . . ? 
O1 P1 C2 99.99(15) . . ? 
O2 P1 Pd1 111.85(9) . . ? 
O1 P1 Pd1 118.59(10) . . ? 
C2 P1 Pd1 110.49(11) . . ? 
C21 P2 C31 109.30(15) . . ? 
C21 P2 C1 105.88(16) . . ? 
C31 P2 C1 107.07(15) . . ? 
C21 P2 Pd1 112.15(11) . . ? 
C31 P2 Pd1 114.19(11) . . ? 
C1 P2 Pd1 107.77(11) . . ? 
C51 O1 P1 116.8(2) . . ? 
C41 O2 P1 119.8(2) . . ? 
C2 C1 P2 108.6(2) . . ? 
C2 C1 H1A 110.0 . . ? 
P2 C1 H1A 110.0 . . ? 
C2 C1 H1B 110.0 . . ? 
P2 C1 H1B 110.0 . . ? 
H1A C1 H1B 108.4 . . ? 
C1 C2 P1 107.1(2) . . ? 
C1 C2 H2A 110.3 . . ? 
P1 C2 H2A 110.3 . . ? 
C1 C2 H2B 110.3 . . ? 
P1 C2 H2B 110.3 . . ? 
H2A C2 H2B 108.5 . . ? 
C26 C21 C22 118.8(3) . . ? 
C26 C21 P2 124.2(3) . . ? 
C22 C21 P2 117.0(3) . . ? 
C23 C22 C21 120.7(4) . . ? 
C23 C22 H22A 119.6 . . ? 
C21 C22 H22A 119.6 . . ? 
C24 C23 C22 119.9(4) . . ? 
C24 C23 H23A 120.1 . . ? 
C22 C23 H23A 120.1 . . ? 
C25 C24 C23 119.7(4) . . ? 
C25 C24 H24A 120.1 . . ? 
C23 C24 H24A 120.1 . . ? 
C24 C25 C26 120.7(4) . . ? 
C24 C25 H25A 119.6 . . ? 
C26 C25 H25A 119.6 . . ? 
C21 C26 C25 120.2(4) . . ? 
C21 C26 H26A 119.9 . . ? 
C25 C26 H26A 119.9 . . ? 
C32 C31 C36 119.4(3) . . ? 
C32 C31 P2 120.0(3) . . ? 
C36 C31 P2 120.6(2) . . ? 
C33 C32 C31 120.3(3) . . ? 
C33 C32 H32A 119.8 . . ? 
C31 C32 H32A 119.8 . . ? 
C34 C33 C32 120.1(3) . . ? 
C34 C33 H33A 119.9 . . ? 
C32 C33 H33A 119.9 . . ? 
C33 C34 C35 120.1(3) . . ? 
C33 C34 H34 120.0 . . ? 
C35 C34 H34 120.0 . . ? 
C36 C35 C34 120.2(3) . . ? 
C36 C35 H35A 119.9 . . ? 
C34 C35 H35A 119.9 . . ? 
C35 C36 C31 119.9(3) . . ? 
C35 C36 H36A 120.1 . . ? 
C31 C36 H36A 120.1 . . ? 
C48 C41 C42 124.1(3) . . ? 
C48 C41 O2 119.8(3) . . ? 
C42 C41 O2 116.1(3) . . ? 
C43 C42 C41 118.9(3) . . ? 
C43 C42 H42A 120.5 . . ? 
C41 C42 H42A 120.5 . . ? 
C42 C43 C49 120.7(3) . . ? 
C42 C43 H43A 119.6 . . ? 
C49 C43 H43A 119.6 . . ? 
C45 C44 C49 121.4(4) . . ? 
C45 C44 H44A 119.3 . . ? 
C49 C44 H44A 119.3 . . ? 
C44 C45 C46 119.6(3) . . ? 
C44 C45 H45A 120.2 . . ? 
C46 C45 H45A 120.2 . . ? 
C47 C46 C45 121.6(4) . . ? 
C47 C46 H46A 119.2 . . ? 
C45 C46 H46A 119.2 . . ? 
C46 C47 C50 120.0(4) . . ? 
C46 C47 H47A 120.0 . . ? 
C50 C47 H47A 120.0 . . ? 
C41 C48 C50 116.9(3) . . ? 
C41 C48 C58 120.7(3) . . ? 
C50 C48 C58 122.3(3) . . ? 
C43 C49 C44 121.6(3) . . ? 
C43 C49 C50 119.6(3) . . ? 
C44 C49 C50 118.8(3) . . ? 
C47 C50 C49 118.4(3) . . ? 
C47 C50 C48 122.1(3) . . ? 
C49 C50 C48 119.4(3) . . ? 
C58 C51 C52 123.6(3) . . ? 
C58 C51 O1 118.4(3) . . ? 
C52 C51 O1 118.0(3) . . ? 
C53 C52 C51 119.2(4) . . ? 
C53 C52 H52A 120.4 . . ? 
C51 C52 H52A 120.4 . . ? 
C52 C53 C59 120.8(4) . . ? 
C52 C53 H53A 119.6 . . ? 
C59 C53 H53A 119.6 . . ? 
C55 C54 C59 121.1(4) . . ? 
C55 C54 H54A 119.5 . . ? 
C59 C54 H54A 119.5 . . ? 
C54 C55 C56 120.4(4) . . ? 
C54 C55 H55A 119.8 . . ? 
C56 C55 H55A 119.8 . . ? 
C57 C56 C55 119.9(4) . . ? 
C57 C56 H56A 120.0 . . ? 
C55 C56 H56A 120.0 . . ? 
C56 C57 C60 121.6(4) . . ? 
C56 C57 H57A 119.2 . . ? 
C60 C57 H57A 119.2 . . ? 
C51 C58 C60 117.5(3) . . ? 
C51 C58 C48 120.3(3) . . ? 
C60 C58 C48 122.2(3) . . ? 
C54 C59 C53 121.5(4) . . ? 
C54 C59 C60 119.1(4) . . ? 
C53 C59 C60 119.3(3) . . ? 
C57 C60 C59 117.8(3) . . ? 
C57 C60 C58 122.9(3) . . ? 
C59 C60 C58 119.1(3) . . ? 
 
_diffrn_measured_fraction_theta_max    0.982 
_diffrn_reflns_theta_full              27.44 
_diffrn_measured_fraction_theta_full   0.982 
_refine_diff_density_max    0.439 
_refine_diff_density_min   -0.518 
_refine_diff_density_rms    0.099 
